# Supplementary material
Source: ML conference proceedings conference paper supplement (https://openreview.net/forum?id=34dHGTri2w)
Supplement: supplementary_material [file attachment]

---

# Follow Hamiltonian Leader: An Efficient Energy-Guided Sampling Method

---

Anonymous Author(s)

Affiliation

Address

email

## Abstract

1 Our research underscores the value of leveraging zeroth-order information for  
2 addressing sampling challenges, particularly when first-order data is unreliable or  
3 unavailable. In light of this, we have developed a novel parallel sampling method  
4 that incorporates a leader-guiding mechanism. This mechanism forges connections  
5 between multiple sampling instances via a selected leader, enhancing both the  
6 efficiency and effectiveness of the entire sampling process. Our experimental  
7 results demonstrate that our method markedly expedites the exploration of the  
8 target distribution and produces superior quality outcomes compared to traditional  
9 sampling techniques. Furthermore, our method also shows greater resilience against  
10 the detrimental impacts of corrupted gradients as intended.

## 11 1 Introduction

12 Score-based generative models [35, 26, 36, 20] introduce a novel approach to generative modeling  
13 that revolves around the estimation and sampling of the Stein score [26, 36]. The score represents  
14 the gradient of the log-density function  $\nabla_x \log \pi(x)$  evaluated at the input data point  $x$ . This type  
15 of approach usually relies on effectively training a deep neural network to accurately estimate the  
16 score. The estimated score is then utilized to navigate the sampling process, ultimately resulting  
17 in the production of high-quality data samples that closely match the areas of high density in the  
18 original distribution.

19 In our research, we investigate the sampling of a probability distribution given by  $\pi(x) \propto e^{-U(x)}$ ,  
20 where  $U(x)$  is the energy function. In the context of energy-based score-matching generative models,  
21 the objective often involves sampling the modes in areas of high probability density. An approach  
22 as suggested in [36, 20], is to smooth the original distribution by convolving  $\pi(x)$  with an isotropic  
23 Gaussian distribution of variance  $\sigma^2$ , yielding  $\pi_\sigma(x) = \int \pi(x') \mathcal{N}(x; x', \sigma^2 I) dx'$ . By gradually  
24 decreasing the variance  $\sigma$ ,  $\pi_\sigma(x)$  recovers the original distribution  $\pi(x)$ .

25 Typically, the sampling of score-based approaches are integrated with numerical SDE solvers [38], for  
26 example, the Euler-Maruyama solver, as well as Monte Carlo Markov Chain (MCMC) techniques like  
27 Langevin Dynamics [30]. Furthermore, there is a notable similarity between score-based sampling  
28 algorithms and first-order optimization algorithms. Efforts have been made to merge these two  
29 methodologies, particularly from a perspective of sampling [42, 10, 28, 9, 44]. All these methods  
30 primarily concentrates on first-order information  $\nabla_x U(x)$  to improve performance, while typically  
31 treating the zeroth-order information  $U(x)$  merely as a basis for rejecting samples [18, 32, 29].

32 We argue that incorporating zeroth-order information can significantly enhance the algorithm's overall  
33 effectiveness, particularly in instances where the first-order information is compromised. To address  
34 this, we draw inspiration from parallel tempering [39], a simulation method commonly used to  
35 identify the lowest energy state in systems of interacting particles. The fundamental principle of

36 parallel tempering involves operating multiple sampling replicas simultaneously, each at a different  
37 temperature level. These temperatures typically range from low, where the system is prone to being  
38 trapped in local minima, to high, which facilitates the system’s ability to surmount energy barriers  
39 and more thoroughly explore the energy landscape.

40 Drawing inspiration from this concept, we extend the Hamiltonian Monte Carlo (HMC) framework  
41 [29] and introduce a novel algorithm that concurrently runs multiple replicas, sampling at both high  
42 and low Hamiltonian energy levels. Moreover, this methodology combines both zeroth and first  
43 order information from various chains, hence enhancing the effectiveness of sampling approaches.  
44 The experimental findings demonstrate the efficacy of our approach in scenarios where relying  
45 solely on first-order knowledge is insufficient. These findings illustrate the capacity of incorporating  
46 zeroth-order information to greatly enhance the efficiency and accuracy of sampling operations in  
47 energy-based score-matching algorithms.

## 48 **2 Background**

### 49 **2.1 Hamiltonian Monte Carlo**

50 The primary purpose of MCMC is to construct a Markov chain that matches its equilibrium distribution  
51 to the target distribution. One of the most popular MCMC methods is Langevin Monte Carlo [17, 32],  
52 which proposes samples in a Metropolis-Hastings [18] framework for more efficient state space  
53 exploration. Another advanced method is HMC [29, 11, 2], which incorporates an auxiliary variable  
54  $p$  and employs Hamiltonian dynamics to facilitate the sampling process. The Hamiltonian function is  
55 structured as a composite of potential energy  $U(x)$  and kinetic energy  $K(p)$ , defined as follows:

$$H(x, p) = U(x) + K(p), \quad (1)$$

56 where  $x$  represents the position of a particle and  $p$  denotes its momentum. Kinetic energy  $K(p)$   
57 is commonly formulated as  $K(p) = \frac{1}{2}p^T M^{-1}p$ , where  $M$  corresponds to the mass matrix. For  
58 simplicity, we assume in this paper that the mass matrix  $M$  is equal to the identity matrix  $I$ . The joint  
59 distribution of position and momentum conforms to the canonical distribution:

$$\pi(x, p) = e^{-H(x,p)} / Z, \quad (2)$$

60 where  $Z = \iint e^{-H(x,p)} dx dp$ . Samples from  $\pi(x)$  can then be obtained by marginalizing  $p$  from  
61  $\pi(x, p)$ , which further requires  $\int_p \pi(x, p) dp = \text{constant}$ . In the HMC algorithm, proposals are  
62 generated by simulating Hamiltonian dynamics and then subjected to a Metropolis criterion to  
63 determine their acceptance or rejection. A commonly employed numerical method for solving these  
64 equations is the *Leapfrog* integrator [3].

65 Recent progress in HMC techniques has focused on increasing their adaptability and applicability in a  
66 variety of contexts. Such developments include the NUTS sampler [21], which features an automatic  
67 mechanism for adjusting the number of simulation steps. The Riemann manifold HMC [15] leverages  
68 Riemannian geometry to modify the mass matrix  $M$ , making use of curvature information to improve  
69 sampling efficiency. Additionally, Stochastic Gradient Hamiltonian Monte Carlo [11, 27] investigates  
70 a stochastic gradient approach within the HMC framework. Our contribution is distinct from these  
71 methods and can be easily integrated with them.

### 72 **2.2 Energy-based score-matching model**

73 Probabilistic models often require normalization, which can become infeasible when dealing with  
74 high-dimensional data [25, 13]. Since the exact probabilities of less probable alternatives become  
75 less crucial as long as they remain relatively lower, rather than solely predicting the most probable  
76 outcome, models can be structured to interpret relationships between variables via an energy function.  
77 Within the context of generative models, these energy-based models (EBMs) are devised to assign  
78 higher energy values to regions of lower probability and lower energy values to regions of higher  
79 probability.

80 Score matching [22, 36] is a method used in statistical modeling and machine learning to estimate a  
81 probability distribution or a probability density function from observed data. It is particularly useful  
82 when direct estimation of the probability distribution is challenging, especially in high-dimensional  
83 spaces. In score matching, the goal is to find an approximation to the probability density function  
84 (PDF) of a dataset by estimating the score function, also known as the gradient of the log-density.

85 The score function represents the derivative of the log PDF with respect to the data. By matching the  
 86 estimated score function to the observed data, one can indirectly estimate the underlying probability  
 87 distribution.

88 A relationship between EBMs and score matching can be established by training EBMs through  
 89 denoising score matching [37]. The training objective is described below:

$$\mathbb{E}_{\pi(x)\mathcal{N}(\epsilon;0,I)} \left[ \left\| \frac{\epsilon}{\sigma} - \nabla_x U_\theta(x + \sigma\epsilon) \right\|_2^2 \right]. \quad (3)$$

90  $U_\theta$  is typically represented as a neural network, with  $\theta$  denoting its parameters. Minimizing this  
 91 objective ensures that  $\nabla_x U_\theta(x) = -\nabla_x \log \pi_\sigma(x)$  and thus  $e^{-U_\theta(x)}$  shall be proportional to  $\pi_\sigma(x)$ .

### 92 3 Motivation

93 In our work, we assume to have access to both the gradi-  
 94 ent information  $\nabla_x U(x)$  as well as the energy information  
 95  $U(x)$ . In certain scenarios, gradients may yield informa-  
 96 tion that is either of limited or potentially detrimental. Our  
 97 research examines situations where gradients are compro-  
 98 mised, highlighting the importance of zeroth-order infor-  
 99 mation, often associated with energy-based sampling.

100 We concentrate on showcasing the strengths of our method  
 101 in three types of challenging but common scenarios, sum-  
 102 marized as *instability*, *metastability* and *pseudo-stability*.

103 Instability refers to a state in which a system lacks equilibrium or steadiness, often leading to unpre-  
 104 dictable or erratic behavior. Metastability describes a condition where a system appears stable over a  
 105 short period but is not in its most stable state, and it can transition to a more stable state under certain  
 106 conditions. Pseudo-stability, on the other hand, denotes a situation where a system seems stable but  
 107 is actually in an incorrect, suboptimal, or misleadingly stable state.

108 **Instability.** In high-dimensional spaces, sampling algo-  
 109 rithms may struggle to converge in the presence of a com-  
 110 plex probability distribution. This instability can arise in  
 111 situations where the local Hessian matrix is ill-conditioned  
 112 or spectrum of the local Hessian matrix is exceptionally  
 113 large. Such conditions often lead to inaccuracies or insta-  
 114 bilities in numerical calculations, potentially causing the  
 115 convergence process to fail. The samples generated could  
 116 substantially diverge from the true mode, resulting in subpar  
 117 sample quality.

118 **Metastability.** Particles are prone to getting stuck in local minima when the gradients are not  
 119 informative. For example, on the saddle point or a pleaute loss landscape. As a result, simulations  
 120 frequently end up in a state of intermediate energy, which is different from the system’s lowest energy  
 121 state. This scenario is illustrated in Figure 2.

122 **Pseudo-Stability.** Certain situations may present a diver-  
 123 gence between the gradient information and the ground  
 124 truth. This divergence can hinder algorithms from accu-  
 125 rately converging to the appropriate modes. In these in-  
 126 stances, it becomes essential to incorporate energy infor-  
 127 mation to rectify inaccuracies that arise from solely depend-  
 128 ing on gradients. An example of misleading gradients could be  
 129 observed in Figure 3.

### 130 4 Algorithm

131 Many sampling methods typically rely on independent  
 132 Markov chains, which can lead to the issues mentioned  
 133 in Section 3. Taking inspiration from [39], our approach  
 134 involves the utilization of multiple replicas. This approach

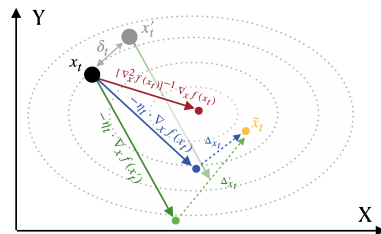

Figure 1: A good *anchor point* could help improve convergence even if the gradient is *unexpectedly disturbed* from *original gradient* to the *disturbed gradient*, getting closer to the *optimal point*.

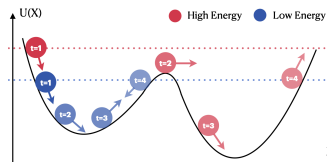

Figure 2: To enhance exploratory capabilities, it’s important to encourage particle to explore the landscape. However, employing an anchor point can enhance the stability of convergence, as demonstrated in Figure 1.

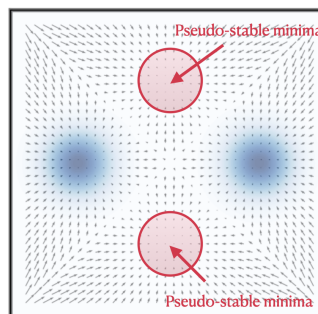

Figure 3: There is a potential for particles to unintentionally follow the gradient flow towards these regions of high energy. A more comprehensive description could be found at Section 5.1.3.

---

**Algorithm 1** Elastic Leapfrog (eLeapfrog)

---

**Input:** A collection of positions  $\{x^i\}_{i=1}^n \in \mathbb{R}^{n \times d}$ , a collection of momenta  $\{p^i\}_{i=1}^n \in \mathbb{R}^{n \times d}$ , learning rate  $\eta > 0$ , pulling strength  $\lambda \geq 0$ , number of Leapfrog steps  $L$ .

**for**  $s = 1, \dots, L$  **do**

**for**  $i = 1, \dots, n$  **do**

    Choose the leader  $x^l$  and calculate  $\rho^i$

$g^i \leftarrow \nabla_x U(x^i) + \rho^i \cdot (x^i - x^l); p^i \leftarrow p^i - \frac{\eta}{2} \cdot g^i$  ▷ Half step for momentum

$x^i \leftarrow x^i + \eta \cdot p^i$  ▷ Full step for position

    Choose the leader  $x^l$  and calculate  $\rho^i$

$g^i \leftarrow \nabla_x U(x^i) + \rho^i \cdot (x^i - x^l); p^i \leftarrow p^i - \frac{\eta}{2} \cdot g^i$  ▷ Half step for momentum

**end for**

**end for**

**Output:**  $x \in \mathbb{R}^d, p \in \mathbb{R}^d$

---

135 enables us to implicitly encourage greater exploration among multiple particles while simultaneously  
136 preserving the optimal outcomes for exploitation purposes. We will elaborate on how our algorithm  
137 can be employed to tackle these challenges.

138 Firstly, we introduce a modified version of the leapfrog method, called the *Elastic Leapfrog*  
139 (eLeapfrog). In this approach, additional elastic forces are applied between each particle and a  
140 *leader*, incorporating an extra elastic energy term into the traditional Hamiltonian function. This  
141 modification aims to prevent particles from straying significantly from each other, thereby promoting  
142 local exploitation. We then divide the particles into groups and designate the particle with the lowest  
143 energy as the leader. Moreover, when combined with the eLeapfrog method, this approach encourages  
144 other particles to explore around the leader, efficiently addressing the problem of **instability**.

145 Due to the properties of HMC, introducing such an extra elastic energy term when pulling the particles  
146 towards the leader implicitly incorporates this energy into the momentum, thereby increasing the  
147 search ability of each particle. As a result, non-leading particles gain more energy for exploration,  
148 while the leading particle is more likely to concentrate on local exploitation. This approach helps  
149 mitigate the issue of **metastability**.

150 Finally, we integrate these techniques to present our complete *Follow Hamiltonian Leader* (FHL)  
151 algorithm. The FHL algorithm capitalizes on both first-order and zeroth-order information while  
152 significantly improving the efficiency of space sampling compared to traditional sequential sampling  
153 methods. This enhanced approach fosters convergence towards the lowest energy states and increases  
154 the likelihood of escaping states with **pseudo stability**.

#### 155 4.1 Elastic Leapfrog

156 To improve the efficiency of sampling, we integrate an elastic force component into the conventional  
157 leapfrog technique. This enhancement aims to dynamically guide particles towards a leading particle,  
158 facilitating their movement and improve their exploration ability. The method could be treated like  
159 temporarily storing potential energy within an elastic spring, which is then converted into kinetic  
160 energy. By adding extra elastic force, we could define the energy of elastic HMC as:

$$H_e(x, p; \tilde{x}) = U_e(x; \tilde{x}) + K(p) = \underbrace{[U(x) + E(x; \tilde{x})]}_{U_e(x, \tilde{x})} + K(p), \quad (4)$$

162 where  $E(x; \tilde{x})$  is the extra elastic energy imposed by Elastic Leapfrog and is defined as  $E(x; \tilde{x}) =$   
163  $\frac{\rho}{2} \|x - \tilde{x}\|_2^2$ . Our approach enables particles to efficiently navigate the sample space, guided by the  
164 leader. This local exploration strategy, though similar to concepts in [46, 7, 8, 40], is uniquely tailored  
165 for application in the realm of sampling.

#### 166 4.2 Leader Pulling

167 Next, we introduce our *leader pulling* method. Initially, we represent the  $i^{th}$  particle inside a group  
168 as  $x^i$  and select a leader based on their energies  $U(x^i)$ . The motivation is that we encourage each

169 particle  $x^i$  to be guided towards a chosen leader. The leader is chosen as the one of minimum energy  
 170 and thus its index is  $l = \arg \min_i U(x^i)$ . The objective function for a group of  $n$  particles is:

$$U_e(x^1, \dots, x^n; x^l) = \sum_{i=1}^n U(x^i) + \frac{\rho^i}{2} \cdot \|x^i - x^l\|_2^2, \quad (5)$$

171 where  $\pi^i = \exp(-U(x^i)) / \sum_j \exp(-U(x^j))$  and  $\rho^i = \lambda \cdot (\pi^l - \pi^i) / (\pi^l + \pi^i)$ . The specifics of  
 172 the *Elastic Leapfrog* algorithm combined with leader pulling technique are detailed in Algorithm 1.  
 173

### 174 4.3 Follow Hamiltonian Leader

175 Incorporating zeroth-order information (i.e., function values rather than derivatives) serves two key  
 176 purposes. Firstly, it provides a search direction that accelerates convergence and helps mitigate issues  
 177 arising from corrupted first-order information (i.e., gradient inaccuracies), thereby speeding up the  
 178 optimization process. Second, it helps ensure that we are sampling from the correct underlying  
 179 distribution by properly accepting or rejecting the proposal.

180 To ensure that the sampling method maintains detailed balance—a requirement for most sampling  
 181 algorithms—we evaluate the joint distribution of a group of particles. This evaluation determines  
 182 whether to accept or reject a proposed move for the whole group, thereby preserving the integrity  
 183 of the sampling process. This adaptation results in the creation of our algorithm FHL, extensively  
 184 elucidated in Algorithm 2.

---

#### Algorithm 2 Follow Hamiltonian Leader

---

**Input:** A collection of positions  $\{x^i\}_{i=1}^n \in \mathbb{R}^{n \times d}$ , learning rate  $\eta > 0$ , pulling strength  $\lambda \geq 0$ ,  
 number of steps  $L$ .

```

for  $t = 1, 2, \dots, T$  do
  # Run sampling in parallel
  for  $i = 1, \dots, n$  do
    Randomly sample the momentum  $p_{t-1}^i \sim \mathcal{N}(0, I)$ 
     $x_{\text{prop}}^i, p_{\text{prop}}^i \leftarrow \text{eLeapfrog}(x_{t-1}^i, p_{t-1}^i, \eta, \lambda, L)$ 
  end for
  Sample a random variable  $u \sim \text{Uniform}(0, 1)$ 
  if  $u < \prod_{i=1}^n \exp(H(x_{\text{prop}}^i, p_{\text{prop}}^i) - H(x_{t-1}^i, p_{t-1}^i))$  then
    for  $i = 1, \dots, n$  do  $x_t^i \leftarrow x_{\text{prop}}^i, p_t^i \leftarrow p_{\text{prop}}^i$  end for
  else
    for  $i = 1, \dots, n$  do  $x_t^i \leftarrow x_{t-1}^i, p_t^i \leftarrow p_{t-1}^i$  end for
  end if
end for
Output:  $X_T = \{x_T^i\}_{i=1}^n \in \mathbb{R}^{n \times d}$ 

```

---

## 185 5 Experiment

186 In this section, we showcase the efficacy of incorporating zeroth-order information, specifically  
 187 energy information, into our proposed method to improve the sampling process. We focus on  
 188 demonstrating the advantages of our approach in addressing the benefits of our approach in handling  
 189 three distinct adversarial gradient scenarios, as outlined in Section 3. To evaluate our method on the  
 190 performance of the concerned questions, we conduct a comparative analysis against the following  
 191 baseline algorithms:

- 192 • **LMC (Langevin Monte Carlo):** An MCMC method as described in [17] that uses Langevin  
 193 dynamics to sample from probability distributions. It is also known as the Metropolis-  
 194 adjusted Langevin algorithm.
- 195 • **HMC (Hamiltonian Monte Carlo):** An MCMC algorithm that employs Hamiltonian dynamics  
 196 for more efficient traversal of the state space, leading to better exploration and sampling  
 197 from complex distributions [29, 11, 2].
- 198 • **U-LMC (Unadjusted Langevin Dynamics):** A variation of LMC without the Metropolis correc-  
 199 tion, referred to [32, 1, 42].

200 • **U-HMC (Unadjusted Hamiltonian Monte Carlo)**: A form of HMC that excludes the Metropolis  
 201 correction step, as in [34, 14].

202 **5.1 Motivating Examples**

203 We report on results addressing the challenges identified as *instability*, *metastability*, and *pseudo-*  
 204 *stability*. Our findings lead us to conclude that the FTH method consistently outperforms other  
 205 approaches in all scenarios examined. Detailed discussions and further analyses of these findings will  
 206 be presented in the following subsections.

207 In our experiment, we simultaneously execute sampling with  $N$  particles, each completing a total of  
 208  $T$  sampling steps. For the FTH method, these particles are divided into  $N/n$  groups, with each group  
 209 containing  $n$  particles. Throughout all experiments, we set  $n$  to 4. For hyperparameter search, we  
 210 select step sizes  $\eta = \{0.002, 0.0002, 0.005, 0.0005\}$  for all methods and number of leapfrog steps  
 211  $L = \{4, 8, 16\}$  for HMC-type methods.

212 **5.1.1 Instability**

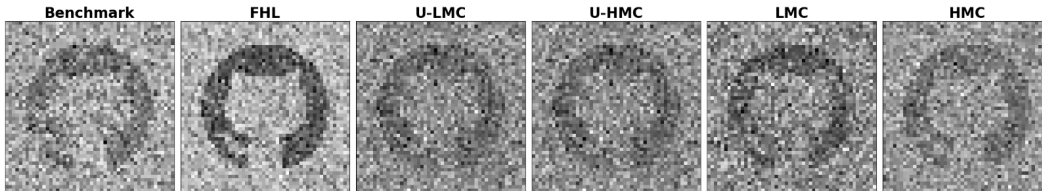

(a) Sampling from the **original distribution** in the form of  $e^{-U(x)}$ .  $T = 1000$  in all experiments.

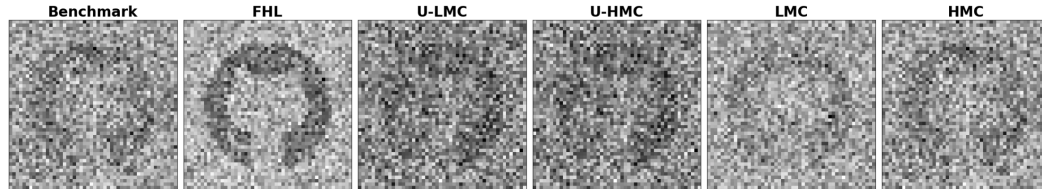

(b) Sampling from the **approximated distribution** in the form of  $e^{-U_\theta(x)}$ .  $T = 2000$  in all experiments.

Figure 4: Sample from a Gaussian distribution  $\mathcal{N}(\mu, \Sigma)$  where  $\mu \in \mathbb{R}^d$  corresponds to the clean image. For each method, we plot the lowest-energy particle (in terms of  $U(x)$  among all particles in  $X_T$ ). The upper-left image represents a direct sample from the distribution  $\mathcal{N}(\mu, \Sigma)$ ; The lower-left image is generated by performing HMC sampling for  $T$  steps on the function  $U_\theta(x)$ , with an initial point set to  $x_0 = \mu$ .

213 In our sampling process, we focus on efficiently directing particles to high probability density regions,  
 214 thereby avoiding unproductive exploration in regions with low probability. When sampling from a  
 215 single image, our goal becomes attaining the global optima, aligning this objective with those found  
 216 in optimization tasks.

217 For our experiment, we chose an image resembling the *GitHub* logo (<https://github.com/logos>),  
 218 converted it into a vector format, and use this as the mean of a multivariate Gaussian distribution.  
 219 The covariance matrix for this distribution, represented by  $\Sigma$ , is diagonal. The variance for each  
 220 dimension of the distribution is randomly determined by a uniform distribution within the range of  
 221  $(0.25, 1.25)$ . We carry out two similar but different types of experiments:

222 In the first experiment, we focus on sampling from the original distribution. This distribution  
 223 is described mathematically as  $e^{-U(x)} \propto \mathcal{N}(\mu, \Sigma)$ , with  $U(x)$  being the energy function that  
 224 characterizes the system.

225 For the energy-based score-matching model, we employ a ResNet [19] architecture with 6 layers  
 226 of a hidden dimension of 256. The results of the sampling process are detailed in Figure 4, where  
 227 the main objective is to assess the particles' capacity for effective convergence to the mode of the  
 228 distribution. In the first scenario,  $U(x)$  represents a convex function, whereas in the second scenario,  
 229  $U_\theta(x)$  is presumed to be non-convex. The findings demonstrate that our approach, FHL, surpasses  
 230 other baseline methods in both situations.

231 **5.1.2 Metastability**

232 Our research explores the concept of  
 233 metastability, which arises in specific  
 234 scenarios. Metastability refers to a  
 235 state of intermediate energy in a dy-  
 236 namic system, differing from its low-  
 237 est energy state. We examine an ex-  
 238 treme scenario where gradients are en-  
 239 tirely absent, and sampling methods  
 240 only get access to the energy informa-  
 241 tion about the distribution.

242 In Figure 5, it’s evident that in this par-  
 243 ticular situation, we enforce the gra-  
 244 dient to be *near zero*, resulting in all  
 245 sampling methods, except FHL and  
 246 LMC, behaving almost like random  
 247 sampling. Nevertheless, owing to the  
 248 leader pulling strategy, FHL retains its  
 249 ability to locate the mode much faster.

250 **5.1.3 Pseudo-stability**

251 This section highlights the phenomenon showcased in Figure 3. Here, particles can become ensnared  
 252 by gradient flows and be coerced into pseudo-stable regions. Despite the eventual recovery of the  
 253 correct distribution by the sampling method, the convergence process can be exceptionally sluggish.

254 To elaborate, we examine a scenario where the samplers solely depend on gradients from  $\nabla \log Q$ ,  
 255 while the energy function  $P$  remains deliberately undisclosed. The distributions  $P$  and  $Q$  are:

- 256 •  $Q \sim \frac{1}{4} [\mathcal{N}(\mu_1, I) + \mathcal{N}(\mu_2, I) + \mathcal{N}(\mu_3, I) + \mathcal{N}(\mu_4, I)]$
- 257 •  $P \sim \frac{1}{2} [\mathcal{N}(\mu_1, I) + \mathcal{N}(\mu_2, I)]$

258 where  $\mu_1 = [-2, 0]$ ,  $\mu_2 = [2, 0]$ ,  $\mu_3 = [0, 2]$  and  $\mu_4 = [0, -2]$ .

259 From Figure 6 we can see that FTH  
 260 does not only capture the modes more  
 261 quickly compared to the other meth-  
 262 ods but also successfully get out of the  
 263 trap of the pseudo-stable regions.

264 Our study addresses the challenges  
 265 of instability, metastability, and  
 266 pseudo-stability, demonstrating that  
 267 the FTH method consistently outper-  
 268 forms other approaches across various  
 269 scenarios. Through illustrative experi-  
 270 ments, we show that FTH rapidly cap-  
 271 tures modes and effectively escapes  
 272 pseudo-stable regions, even when gra-  
 273 dients are entirely absent. This supe-  
 274 rior performance is attributed to  
 275 FTH’s unique leader pulling strat-  
 276 egy, which directs particles efficiently  
 277 to high-probability density regions,  
 278 thereby avoiding unproductive explo-  
 279 ration in low-probability areas.

280 In the following section, we will illustrate the advantages of FTH in more general applications,  
 281 particularly for energy-based (score-matching) models.

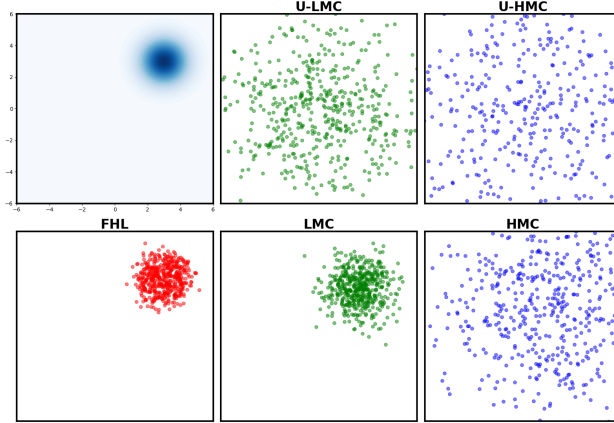

Figure 5: Plot of  $N = 256$  particles of  $X_T$  on  $d = 2$  starting from random initialization  $\mathcal{N}(0, 4 \cdot I)$ . The target distribution is  $\mathcal{N}([1, 1], I)$ . Energy State corresponds to the target density  $\pi$ . The baseline methods U-LMC, LMC, U-HMC, HMC and our proposed method FHL generate  $X_T$  after  $T = 1000$  steps. There are no gradient flows and the samplers are only able to sample by the energy information.

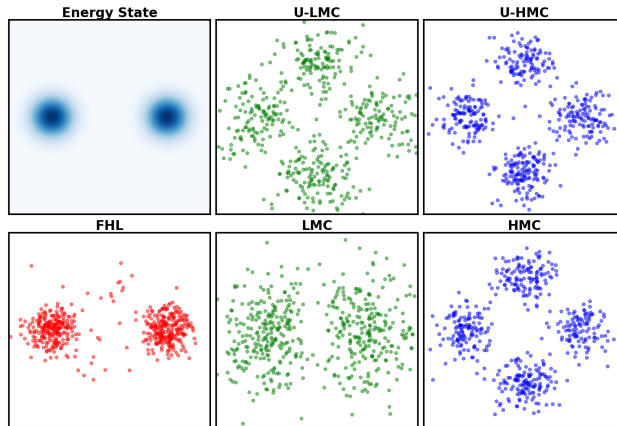

Figure 6: Plot of  $N = 256$  particles of  $X_T$  for a 2-mode Gaussian mixture model on  $d = 2$  starting from random initialization  $\mathcal{N}(0, 4 \cdot I)$ . Energy State corresponds to the target density  $\pi$ . The baseline methods U-LMC, LMC, U-HMC, HMC and our proposed method FHL generate  $X_T$  after  $T = 200$  steps.

282 **5.2 Energy-Based Generative Model**

283 Energy-based models (EBMs) offer significant advantages for sampling because they naturally  
 284 provide energy information that can be utilized to guide the sampling process. In an EBM, the energy  
 285 function assigns lower energy values to more probable configurations, enabling the sampler to more  
 286 effectively navigate the probability landscape and generate high-quality samples. This makes EBMs  
 287 a powerful tool in scenarios where precise sampling is essential.

288 We investigate a scenario where energy functions guide the sampling process. We use the generative  
 289 model outlined in [16] and adopt a conditional generation method that leverages classifier-derived  
 290 gradients for sampling. The classifier’s output is considered as the energy for guided sampling.  
 291 The common classification tasks involving  $C$  classes are often solved by using a neural network  
 292  $f_\theta : \mathbb{R}^d \rightarrow \mathbb{R}^C$ , which maps each input data point  $x \in \mathbb{R}^d$  to  $C$ -categorical outputs. The output are  
 293 then used to define a categorical distribution of class  $y$  through a *softmax* function:

$$p_\theta(y | x) = \frac{\exp(f_\theta(x)[y])}{\sum_{y'} \exp(f_\theta(x)[y'])},$$

294 where  $f_\theta(x)[y]$  represents the  $y$ -th component of  $f_\theta(x)$ , corresponding to the logit for class  $y$ . Once  
 295 the classifier is trained,  $p'_\theta(y | x) = \exp(f_\theta(x)[y])$  could be used to sample for a specific class  $y$ .

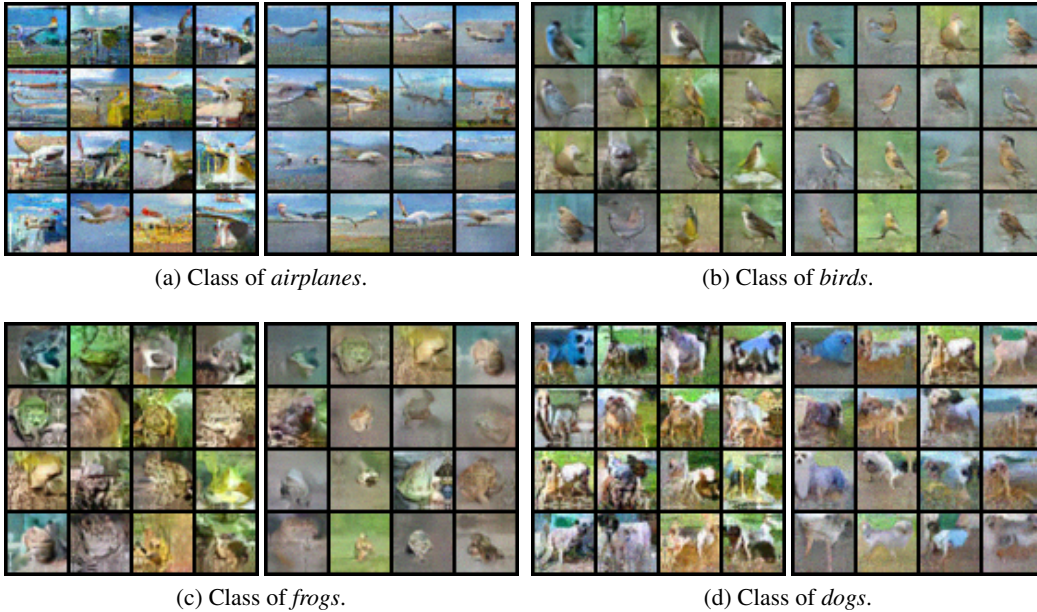

Figure 7: Sample from joint energy model by different classes (**Left:** HMC; **Right:** FTH).

296 We compare FTH with the standard HMC method using a limited number of sampling steps, con-  
 297 sistently accepting new proposals based on the potential energy during sampling. It is evident that  
 298 FTH produces higher-quality images than HMC. Additionally, our experiments reveal that FTH tends  
 299 to generate sharper images compared to the other method. This can be attributed to the assumption  
 300 that the classifier focuses on the object’s features rather than the entire image. As a result, when the  
 301 prediction probability is high, the features that increase confidence become more prominent, while  
 302 unrelated background elements are filtered out.

303 **5.3 Energy-Based Score-Matching Models**

304 As indicated in [12], when two diffusion models are combined into a product model  $q^{\text{prod}}(x) \propto$   
 305  $q^1(x)q^2(x)$ , problems can arise if the model reversing the diffusion uses a score estimate derived  
 306 by simply adding the score estimates of the two independent models. We use energy-based score-  
 307 matching models to illustrate this issue. It is important to note that such inconsistencies typically  
 308 involve the composition of two or more diffusion models.



309 **5.3.1 Synthetic Dataset**

310 We first show an example of composing two distributions  $p_1(x)$  and  $p_2(x)$ , as illustrated in the left  
 311 column of Figure 8. The results show that FTH demonstrates a strong ability to converge to the  
 312 correct composition, with less particles fall out of the high-density region compared to others.

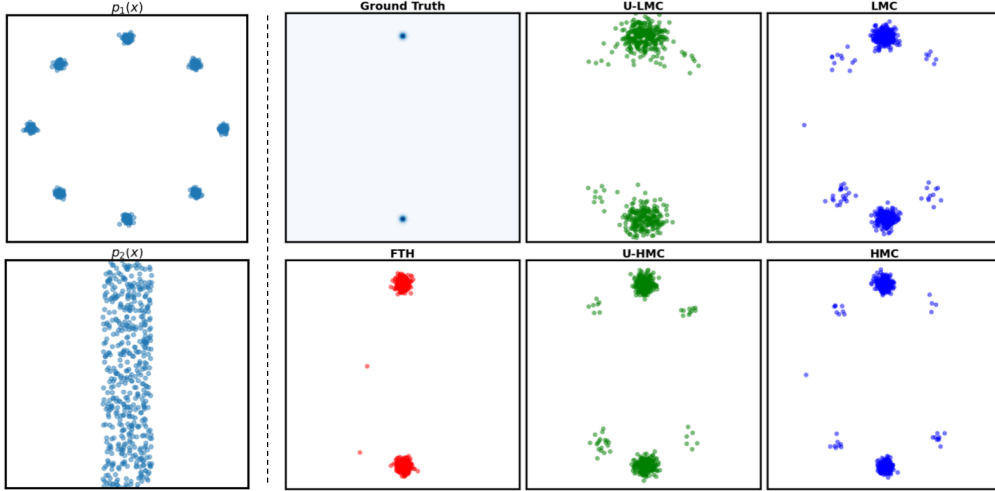

Figure 8: Compose sampling with DDPM.

313 **5.3.2 CLEVR Dataset**

314 We use CLEVR dataset from [23] for our gen-  
 315 eration and sampling tasks. The energy model  
 316 is adopted from [12], and we employ different  
 317 samplers for generation. The dataset includes  
 318 three classes: *cube*, *sphere*, and *cylinder*. We  
 319 explore scenarios where we first sample from  
 320 only *one* category and then from *two* categories.

321 In the first experiment, there is no composition  
 322 of models. As depicted in Figure 9, it is evident  
 323 that FTH effectively generates the desired image  
 324 without any extraneous shapes, whereas both  
 325 MALA and HMC generate additional shapes.

326 In the second experiment, we combine two in-  
 327 dependent diffusion models, each trained sepa-  
 328 rately to generate *sphere* and *cylinder*. As shown  
 329 in Figure 10, it is clear that FTH excels at pro-  
 330 ducing high-quality images with almost no over-  
 331 lapping between objects, accurately rendering the  
 332 intended shapes in a pristine manner. In contrast,  
 333 the other methods generate the undesired shape *cube*. Additionally, FTH exhibits less noise, indicating greater stability for sampling.

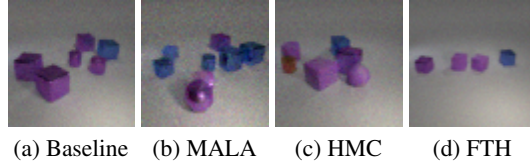

Figure 9: Generation of *cube*. The zoomed images could be found at Figure 19.

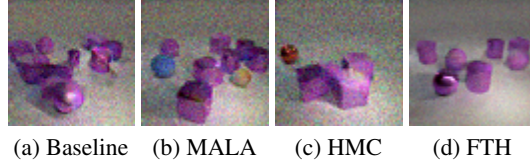

Figure 10: Generation of *sphere* and *cylinder*. The zoomed images could be found at Figure 20.

334 **6 Conclusion**

335 In this study, we first recognize the significance of incorporating zeroth-order information into the  
 336 sampling process, highlighting the common limitations faced by conventional sampling methods.  
 337 These limitations include unstable sampling outcomes frequently associated with energy-based  
 338 score-matching models, the potential metastability arising from the multi-modal nature of the energy  
 339 function, and errors in gradient computation stemming from the complex structure of the composi-  
 340 tional distribution. Subsequently, we present an innovative approach that leverages parallel HMC  
 341 sampling to address the issues. Building upon HMC, we incorporate energy modulation techniques  
 342 to enhance the sampling process. Through this approach, our method is able to systematically reduce  
 343 the potential energy, leading to substantial advantages in practical implementations of sampling.

344 **References**

- 345 [1] Christophe Andrieu, Éric Moulines, and Francis J Samson. Particle markov chain monte carlo  
346 for efficient numerical simulation. *Statistical Science*, 25(4):332–350, 2010.
- 347 [2] Michael Betancourt. A Conceptual Introduction to Hamiltonian Monte Carlo, July 2018.
- 348 [3] Charles K. Birdsall and A. Bruce Langdon. *Plasma physics via computer simulation*. Taylor  
349 and Francis, New York, 2005.
- 350 [4] Jérôme Bolte and Edouard Pauwels. A mathematical model for automatic differentiation in  
351 machine learning. *Advances in Neural Information Processing Systems*, 33:10809–10819, 2020.
- 352 [5] Steve P. Brooks, Andrew Gelman, Galin L. Jones, and Xiao-Li Meng. Handbook of markov  
353 chain monte carlo: Hardcover: 619 pages publisher: Chapman and hall/crc press (first edition,  
354 may 2011) language: English isbn-10: 1420079417. *CHANCE*, 25:53 – 55, 2012.
- 355 [6] Augustin Louis Cauchy. Méthode générale pour la résolution des systèmes d’équations simul-  
356 tanées. *Comptes Rendus de l’Académie des Sciences Paris*, 25:536–538, 1847.
- 357 [7] P. Chaudhari, A. Choromanska, S. Soatto, Y. LeCun, C. Baldassi, C. Borgs, J. T. Chayes,  
358 L. Sagun, and R. Zecchina. Entropy-SGD: Biasing gradient descent into wide valleys. In *ICLR*,  
359 2017.
- 360 [8] Pratik Chaudhari, Carlo Baldassi, Riccardo Zecchina, Stefano Soatto, Ameet Talwalkar,  
361 and Adam Oberman. Parle: parallelizing stochastic gradient descent. *arXiv preprint*  
362 *arXiv:1707.00424*, 2017.
- 363 [9] Changyou Chen, David Carlson, Zhe Gan, Chunyuan Li, and Lawrence Carin. Bridging the  
364 gap between stochastic gradient mcmc and stochastic optimization. In Arthur Gretton and  
365 Christian C. Robert, editors, *Proceedings of the 19th International Conference on Artificial*  
366 *Intelligence and Statistics*, volume 51 of *Proceedings of Machine Learning Research*, pages  
367 1051–1060, Cadiz, Spain, 09–11 May 2016. PMLR.
- 368 [10] Tianqi Chen, Emily Fox, and Carlos Guestrin. Stochastic Gradient Hamiltonian Monte Carlo.  
369 In *Proceedings of the 31st International Conference on Machine Learning*, pages 1683–1691.  
370 PMLR, June 2014.
- 371 [11] Tianqi Chen, Emily Fox, and Carlos Guestrin. Stochastic gradient hamiltonian monte carlo.  
372 In Eric P. Xing and Tony Jebara, editors, *Proceedings of the 31st International Conference on*  
373 *Machine Learning*, volume 32 of *Proceedings of Machine Learning Research*, pages 1683–1691,  
374 Beijing, China, 22–24 Jun 2014. PMLR.
- 375 [12] Yilun Du, Conor Durkan, Robin Strudel, Joshua B. Tenenbaum, Sander Dieleman, Rob Fer-  
376 gus, Jascha Sohl-Dickstein, Arnaud Doucet, and Will Grathwohl. Reduce, reuse, recycle:  
377 Compositional generation with energy-based diffusion models and mcmc. *JMLR.org*, 2023.
- 378 [13] Yilun Du and Igor Mordatch. Implicit generation and modeling with energy based models. In  
379 H. Wallach, H. Larochelle, A. Beygelzimer, F. dAlché-Buc, E. Fox, and R. Garnett, editors,  
380 *Advances in Neural Information Processing Systems*, volume 32. Curran Associates, Inc., 2019.
- 381 [14] Tomas Geffner and Justin Domke. MCMC Variational Inference via Uncorrected Hamiltonian  
382 Annealing. In *Advances in Neural Information Processing Systems*, volume 34, pages 639–651.  
383 Curran Associates, Inc., 2021.
- 384 [15] Mark Girolami, Ben Calderhead, and Siu A Chin. Riemann Manifold Langevin and Hamiltonian  
385 Monte Carlo.
- 386 [16] Will Grathwohl, Kuan-Chieh Wang, Joern-Henrik Jacobsen, David Duvenaud, Mohammad  
387 Norouzi, and Kevin Swersky. Your classifier is secretly an energy based model and you should  
388 treat it like one. In *International Conference on Learning Representations*, 2020.
- 389 [17] Ulf Grenander and Michael I. Miller. Representations of Knowledge in Complex Systems.  
390 *Journal of the Royal Statistical Society. Series B (Methodological)*, 56(4):549–603, 1994.

- 391 [18] W. K. Hastings. Monte carlo sampling methods using markov chains and their applications.  
392 *Biometrika*, 57(1):97–109, 1970.
- 393 [19] Kaiming He, Xiangyu Zhang, Shaoqing Ren, and Jian Sun. Deep residual learning for image  
394 recognition. In *Proceedings of the IEEE conference on computer vision and pattern recognition*,  
395 pages 770–778, 2016.
- 396 [20] Jonathan Ho, Ajay Jain, and Pieter Abbeel. Denoising diffusion probabilistic models. In  
397 H. Larochelle, M. Ranzato, R. Hadsell, M.F. Balcan, and H. Lin, editors, *Advances in Neural*  
398 *Information Processing Systems*, volume 33, pages 6840–6851. Curran Associates, Inc., 2020.
- 399 [21] Matthew D. Hoffman and Andrew Gelman. The No-U-Turn Sampler: Adaptively Setting Path  
400 Lengths in Hamiltonian Monte Carlo, November 2011.
- 401 [22] Aapo Hyvärinen. Estimation of non-normalized statistical models by score matching. *Journal*  
402 *of Machine Learning Research*, 6(24):695–709, 2005.
- 403 [23] Justin Johnson, Bharath Hariharan, Laurens van der Maaten, Li Fei-Fei, C. Lawrence Zitnick,  
404 and Ross B. Girshick. Clevr: A diagnostic dataset for compositional language and elementary  
405 visual reasoning. *2017 IEEE Conference on Computer Vision and Pattern Recognition (CVPR)*,  
406 pages 1988–1997, 2016.
- 407 [24] S. Kirkpatrick, C. D. Gelatt, and M. P. Vecchi. Optimization by simulated annealing. *Science*  
408 *(New York, N.Y.)*, 220(4598):671–680, 1983.
- 409 [25] Yann LeCun, Sumit Chopra, Raia Hadsell, Marc Aurelio Ranzato, and Fu Jie Huang. A tutorial  
410 on energy-based learning. 2006.
- 411 [26] Qiang Liu, Jason Lee, and Michael Jordan. A kernelized stein discrepancy for goodness-of-fit  
412 tests. In Maria Florina Balcan and Kilian Q. Weinberger, editors, *Proceedings of The 33rd*  
413 *International Conference on Machine Learning*, volume 48 of *Proceedings of Machine Learning*  
414 *Research*, pages 276–284, New York, New York, USA, 20–22 Jun 2016. PMLR.
- 415 [27] Yi-An Ma, Tianqi Chen, and Emily Fox. A Complete Recipe for Stochastic Gradient MCMC.  
416 In *Advances in Neural Information Processing Systems*, volume 28. Curran Associates, Inc.,  
417 2015.
- 418 [28] Yi-An Ma, Yuansi Chen, Chi Jin, Nicolas Flammarion, and Michael I. Jordan. Sampling can be  
419 faster than optimization. *Proceedings of the National Academy of Sciences*, 116(42):20881–  
420 20885, 2019.
- 421 [29] Radford M. Neal. *MCMC Using Hamiltonian Dynamics*. May 2011.
- 422 [30] G. Parisi. Correlation functions and computer simulations. *Nuclear Physics B*, 180(3):378–384,  
423 1981.
- 424 [31] B.T. Polyak. Some methods of speeding up the convergence of iteration methods. *USSR*  
425 *Computational Mathematics and Mathematical Physics*, 4(5):1–17, 1964.
- 426 [32] Gareth O. Roberts and Richard L. Tweedie. Exponential convergence of Langevin distributions  
427 and their discrete approximations. *Bernoulli*, 2(4):341 – 363, 1996.
- 428 [33] Olaf Ronneberger, Philipp Fischer, and Thomas Brox. U-net: Convolutional networks for  
429 biomedical image segmentation. In *International Conference on Medical image computing and*  
430 *computer-assisted intervention*, pages 234–241. Springer, 2015.
- 431 [34] Jascha Sohl-Dickstein, Mayur Mudigonda, and Michael DeWeese. Hamiltonian monte carlo  
432 without detailed balance. In Eric P. Xing and Tony Jebara, editors, *Proceedings of the 31st*  
433 *International Conference on Machine Learning*, volume 32 of *Proceedings of Machine Learning*  
434 *Research*, pages 719–726, Beijing, China, 22–24 Jun 2014. PMLR.
- 435 [35] Jascha Sohl-Dickstein, Eric Weiss, Niru Maheswaranathan, and Surya Ganguli. Deep unsu-  
436 pervised learning using nonequilibrium thermodynamics. In Francis Bach and David Blei,  
437 editors, *Proceedings of the 32nd International Conference on Machine Learning*, volume 37 of  
438 *Proceedings of Machine Learning Research*, pages 2256–2265, Lille, France, 07–09 Jul 2015.  
439 PMLR.

- 440 [36] Yang Song and Stefano Ermon. Generative modeling by estimating gradients of the data  
441 distribution. In H. Wallach, H. Larochelle, A. Beygelzimer, F. dAlché-Buc, E. Fox, and  
442 R. Garnett, editors, *Advances in Neural Information Processing Systems*, volume 32. Curran  
443 Associates, Inc., 2019.
- 444 [37] Yang Song and Diederik P. Kingma. How to Train Your Energy-Based Models, February 2021.
- 445 [38] Yang Song, Jascha Sohl-Dickstein, Diederik P Kingma, Abhishek Kumar, Stefano Ermon, and  
446 Ben Poole. Score-based generative modeling through stochastic differential equations. In  
447 *International Conference on Learning Representations*, 2021.
- 448 [39] Robert Swendsen and Jian-Sheng Wang. Replica monte carlo simulation of spin-glasses.  
449 *Physical review letters*, 57:2607–2609, 12 1986.
- 450 [40] Y. Teng, W. Gao, F. Chalus, A. Choromanska, D. Goldfarb, and A. Weller. Leader stochastic  
451 gradient descent for distributed training of deep learning models. In *NeurIPS*, 2019.
- 452 [41] Yunfei Teng, Wenbo Gao, Francois Chalus, Anna Choromanska, Donald Goldfarb, and Adrian  
453 Weller. Leader Stochastic Gradient Descent for Distributed Training of Deep Learning Models:  
454 Extension, April 2022.
- 455 [42] Max Welling and Yee Whye Teh. Bayesian learning via stochastic gradient langevin dynamics.  
456 In *Proceedings of the 28th International Conference on International Conference on Machine*  
457 *Learning*, ICML’11, page 681–688, Madison, WI, USA, 2011. Omnipress.
- 458 [43] Han Xiao, Kashif Rasul, and Roland Vollgraf. Fashion-mnist: a novel image dataset for  
459 benchmarking machine learning algorithms, 2017.
- 460 [44] Qiwei Ye, Yuxuan Song, Chang Liu, Fangyun Wei, Tao Qin, and Tie-Yan Liu. Particle based  
461 stochastic policy optimization. 2021.
- 462 [45] Sergey Zagoruyko and Nikos Komodakis. Wide residual networks. *arXiv preprint*  
463 *arXiv:1605.07146*, 2016.
- 464 [46] S. Zhang, A. Choromanska, and Y. LeCun. Deep learning with elastic averaging SGD. In *NIPS*,  
465 2015.

# Follow Hamiltonian Leader: An Efficient Energy-Guided Sampling Method (Supplementary Material)

## 471 A Additional Discussion for Section 3

### 472 A.1 Instability & Metastability

473 We now approach this problem from an optimization perspective. There is a strong connection  
474 between optimization and sampling, particularly through the principle of simulated annealing [24],  
475 which demonstrates how sampling methods can be transformed into optimization techniques.

476 With a slight abuse of notation, we consider the following objective function:

$$U(x) = x[1]^2 + 0.01 \cdot x[2]^2,$$

477 where  $x \in \mathbb{R}^2$  and  $x[i]$  denotes the  $i^{\text{th}}$  dimension of  $x$ . This is a 2-dimensional optimization problem  
478 with a condition number of 100, indicating it is somewhat ill-conditioned.

479 For  $n$  particles, the objective function is:

$$U_e(x^1, \dots, x^n; x^l) = \sum_{i=1}^n U(x^i) + \frac{\rho}{2} \cdot \|x^i - x^l\|_2^2,$$

480 where we set  $\rho = 0.1$ . We initialize  $x^1 = (2, 2)$  and  $x^2 = (-1, -3)$  respectively, and optimize the  
481 objective function using the gradient descent method. Note that when  $n = 1$ , this method reduces to  
482 vanilla gradient descent, while  $n = 2$  incorporates our leader-pulling scheme.

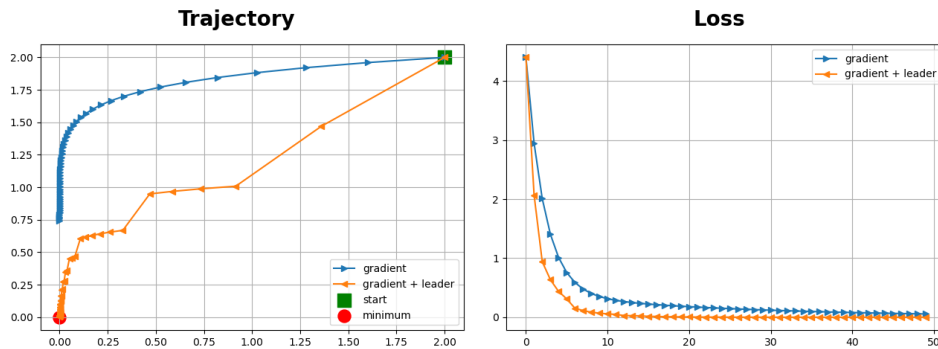

Figure 11:  $U(x^1)$  with gradient descent method [6]. The learning rate is set to 0.1.

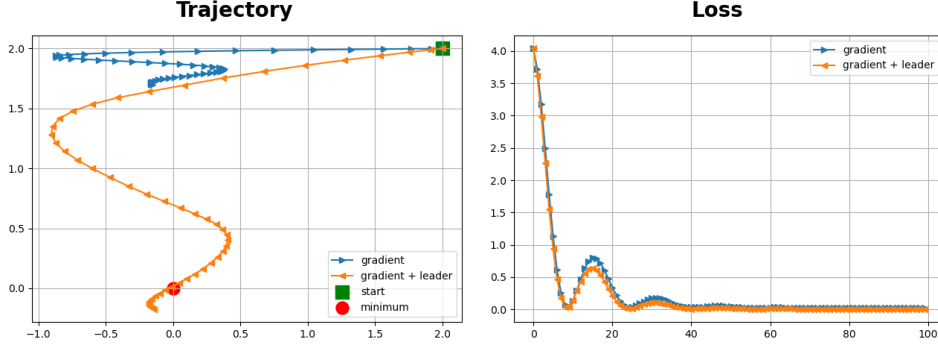

Figure 12:  $U(x^1)$  with heavy-ball method [31]. The learning rate and momentum are set to 0.02 and 0.9 respectively.

483 From Figure 11, we can see that incorporating the leader-pulling scheme helps improve convergence.  
 484 This demonstrates that the leader-pulling scheme can address the issue of instability in optimization.  
 485 However, we also observe that a carefully chosen leader is usually required for our method, which  
 486 we will leave for future discussion.

487 Furthermore, as shown in Figure 12, the particle using the leader-pulling scheme explores much  
 488 further compared to the vanilla heavy-ball method. This outcome is expected, as we want the method  
 489 to enhance exploration and thereby resolve the metastability issue.

## 490 A.2 Pseudo Stability

491 These challenges are commonly encountered when sampling from compositional models, particularly  
 492 when one of the distributions is a piecewise-constant distribution with its gradients are zero almost  
 493 everywhere in its domain. To illustrate this, consider the example  $\pi(x) \propto \pi_1(x) \cdot \pi_2(x)$ . Here we  
 494 consider  $\partial \log \pi_2$  equals to zero everywhere.

495 It's worth noting that while combining distributions in their logarithmic forms is straightforward,  
 496 which leads to  $\log \pi(x) = \log \pi_1(x) + \log \pi_2(x) + \text{constant}$ , omitting the constant  $\log \pi(x)$  can  
 497 be readily derived from the individual  $\log \pi_1(x)$  and  $\log \pi_2(x)$ . However, the composition of their  
 498 gradients becomes problematic, as the computation of the sub-gradient  $\partial_x \log \pi(x) \neq \nabla_x \log \pi_1(x) +$   
 499  $\partial_x \log \pi_2(x)$  in general due to the use of automatic differentiation in machine learning [4].

500 In this section, we focus on the disparity between gradient and energy in the context of combining  
 501 two distributions as indicated in Section 3.

502 We analyze a composite probability distribution structured as  $\pi(x) \propto \pi_1(x) \cdot \pi_2(x)$ , leading to the  
 503 construction of two specific distributions:

- 504 • The first distribution,  $\pi_1(x)$ , is given by:

$$\pi_1(x) = \frac{1}{|X|} \sum_{\mu \in X} \mathcal{N}(\mu, \sigma^2 I),$$

505 where  $|X|$  represents the cardinality of the set  $X$ , indicating the total number of elements in  
 506  $X$ .

- 508 • The second distribution  $\pi_2(x)$ , is defined as

$$\pi_2(x) = \frac{\mathbb{1}_{x \in \Omega_Y}}{\text{Vol}(\Omega_Y)},$$

509 with  $\Omega_Y$  being the set where  $\Omega_Y = \{x \mid d(x, Y) < \epsilon\}$ . In this context, the distance metric  $d$   
 510 is specified by  $d(x, Y) = \arg \min_{y \in Y} \|x - y\|_2$ , indicating the minimum Euclidean distance  
 511 from  $x$  to any point in the set  $Y$ .  
 512

513 Observe that  $\pi_1$  constitutes a smooth distribution, whereas  $\pi_2$  is a piecewise-constant distribution.  
 514 Consequently, for  $\pi_2$ , the gradients are zero almost everywhere. When we consider the expression  
 515  $\nabla_x \log \pi_1(x) + \partial_x \log \pi_2(x)$ , it could be simplified to  $\nabla_x \log \pi_1(x)$ , which is not equivalent to  
 516  $\partial_x \log \pi(x)$  in general.

517 In the subsequent subsections, we present two motivating examples: one in a low-dimensional setting  
 518 and the other in a high-dimensional context. Throughout these experiments, we set  $\sigma^2 = 0.002$  and  
 519  $\epsilon = 0.2$ . In this section, the outcomes of U-LMC and U-HMC are omitted because both techniques  
 520 succumb to the issue of misleading gradients by nature, causing worse performance.

521 **A.2.1 Low-dimensional Example**

We propose an example inspired from [12] but in a different setting. In this revision, we begin by providing a more specific definition for two distributions. For the first distribution  $\pi_1$ , we define:

$$X = \{(\cos(2\pi i/8), \sin(2\pi i/8)) \mid i = 1, 2, \dots, 8\},$$

and for the second distribution  $\pi_2$ , we specify:

$$Y = \{(\cos(2\pi i/8), \sin(2\pi i/8)) \mid i = 2, 4, 6, 8\}.$$

522 It's important to note that, by definition,  $Y$  is a subset of  $X$ .

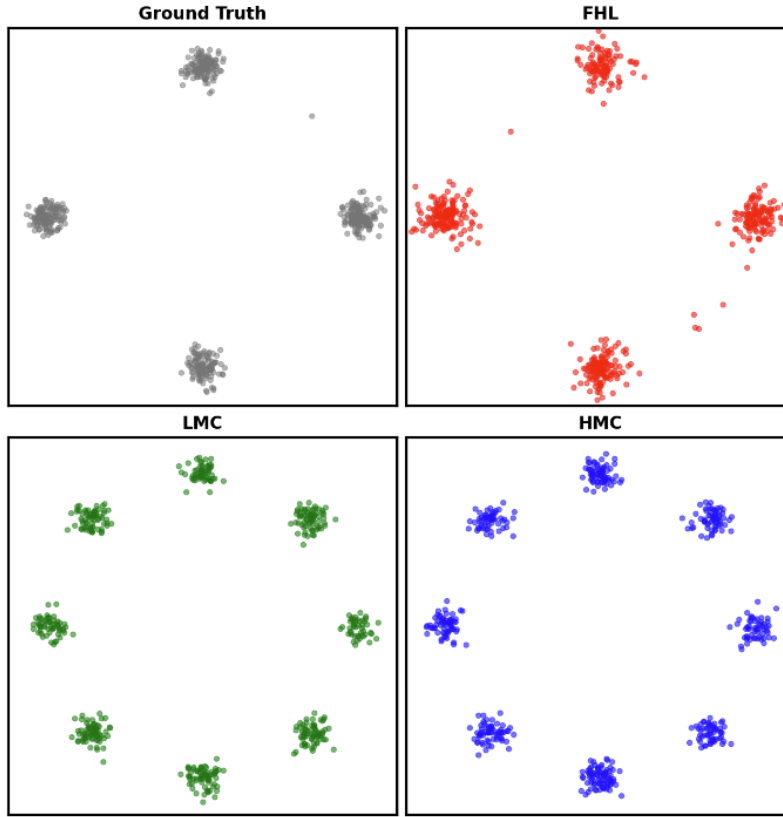

Figure 13: Plot of  $N = 512$  particles of  $X_T$  for a 4-mode compositional Gaussian mixture model  $\pi \propto \pi_1 \cdot \pi_2$  on  $d = 2$ . We sample by gradient  $\nabla \log \pi_1$  and energy  $\pi_1 \cdot \pi_2$ . The baseline methods LMC, HMC and our proposed method FHL generate  $X_T$  after  $T = 4000$  steps, using the initial particles  $X_0 = \{x_0^i\}$  with  $x_0^i$  sampled from a common distribution.

523 We perform a comparative study of our methods against established benchmarks, and the visual  
 524 representations of this comparison can be found in Figure 13. Notably, among the compared methods,  
 525 FTH distinguishes itself due to its outstanding performance, mainly attributed to its precise adjustment  
 526 of particle positions. The comparative results highlight that the baseline methods often exhibit the  
 527 tendency to erroneously converge towards incorrect modes due to the misleading gradients. Although  
 528 rejection steps of HMC and LMC might mitigate incorrect sampling, particles initialized near  
 529 high-energy modes struggle to escape this erroneous attraction by misleading gradients.

530 **A.2.2 High-dimensional Example**

531 We then present a case study in which we generate examples from a particular category within the  
 532 Fashion MNIST dataset [43]. In this experiment, we select a total of 200 images, with 100 images

533 from the *coat* category and another 100 from *trouser* category. We denote the sets of data points from  
 534 the *coat* and *trouser* categories as  $X_{\text{coat}}$  and  $X_{\text{trouser}}$  respectively. Furthermore, we define  $X$  as the  
 535 union of  $X_{\text{coat}}$  and  $X_{\text{trouser}}$ , and  $Y$  is set to  $X_{\text{coat}}$  in this case.

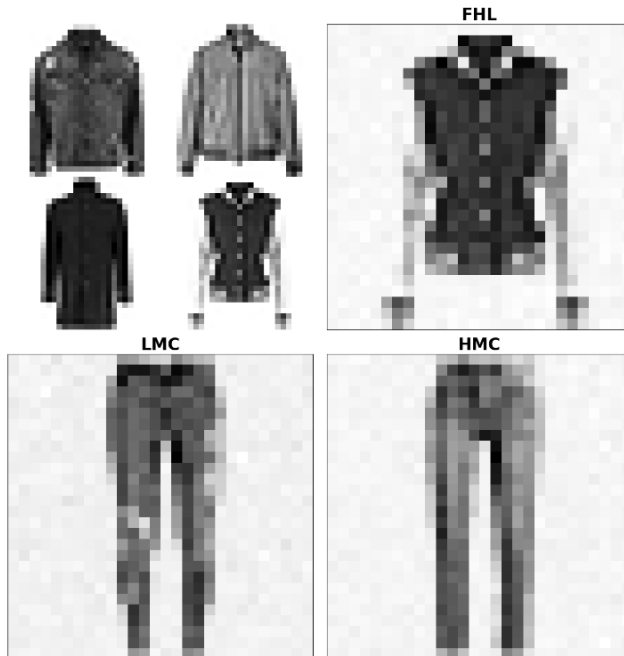

Figure 14: Sample from a 100-mode compositional Gaussian mixture model  $\pi \propto \pi_1 \cdot \pi_2$  on  $d = 784$ , where each mode corresponds to a clean image from *coat* category. We sample by gradient  $\nabla \log \pi_1$  and energy  $\pi_1 \cdot \pi_2$ . For each method, we plot the smallest-energy particle (in terms of  $U(x)$  among all particles in  $X_T$ ). The correct samples are displayed in the upper-left corner.

536 To increase the difficulty of the sampling task, we initially position each particle at the mean location  
 537 of  $X_{\text{trouser}}$ . The outcomes of the sampling are depicted in Figure 15. This setup showcases the FHL  
 538 method’s ability to accurately target and sample from the specified *coat* category, in contrast to  
 539 baseline methods that undesirably draw samples from the *trouser* category.

## 540 B Supplementary Experiment

### 541 B.1 Experiment Setup

542 **In Section 5.2**, we utilize a pre-trained classifier available on the public GitHub repository at  
 543 <https://github.com/wgrathwohl/JEM>. This classifier is a WideResNet model [45] with a depth  
 544 of 28 and a width of 2.

545 We use a technique called one-step HMC [5] and thus the momentum gets refreshed for each step.  
 546 More specifically, for both FTH and HMC we set the momentum damping factor to 0.9 and the mass  
 547 matrix as  $0.004^2 \cdot I$ . We take step size as  $\eta = 0.2$ . Since the mass matrix is set to a relatively small  
 548 value which easily causes the instability of training, we always accept the proposed states based on  
 549 the potential energy and ignore the kinetic energy.

550 **In Section 5.3**, we mainly adapted the codes and models from [https://github.com/yilundu/reduce\\_reuse\\_recycle](https://github.com/yilundu/reduce_reuse_recycle).

552 For Section 5.3.1, we initially train a 4-layer ResNet as the energy-based score-matching model on  $p_1$   
 553 and  $p_2$  independently. During the sampling process, we combine these models. We employ step sizes  
 554  $\eta = \{0.002, 0.0002, 0.005, 0.0005\}$  for all methods and the number of leapfrog steps  $L = \{4, 8\}$  for  
 555 HMC-type methods.

556 For Section 5.3.2, we utilize a U-net architecture [33] as the energy-based score-matching model.  
 557 This architecture is directly obtained from a pre-trained model available at . For sampling, we use step  
 558 sizes  $\eta = \{0.01, 0.035, 0.05, 0.1, 0.2\}$  for all methods and set the number of leapfrog steps  $L = 4$   
 559 for HMC-type methods.



560 **B.2 Additional Results**

561 **B.2.1 Additional Images for Section 5.2**

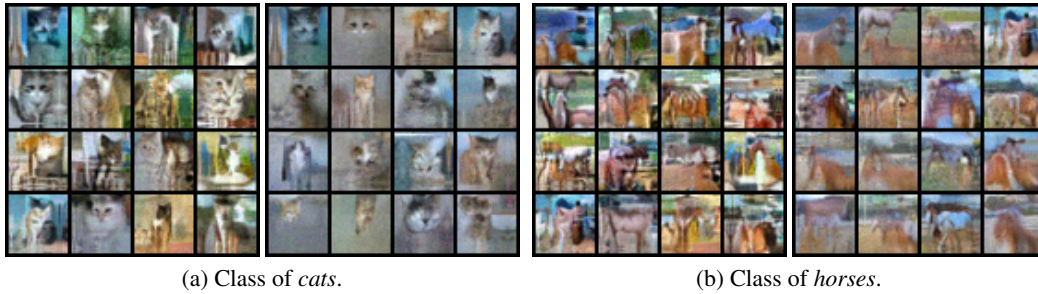

Figure 15: Sample from joint energy model by different classes (**Left: HMC; Right: FTH**).

562 **B.2.2 Additional Images for Section 5.3.2**

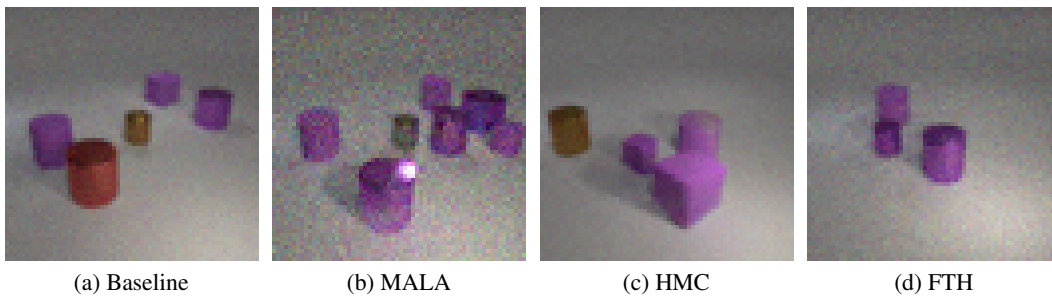

Figure 16: Generation of *cylinder*.

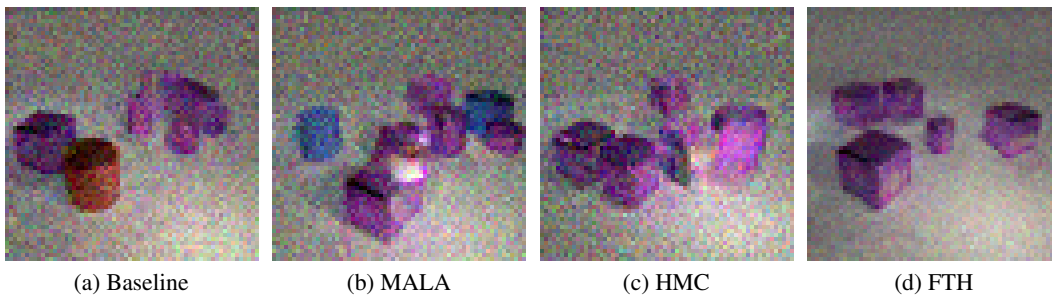

Figure 17: Generation of *cube* and *cylinder*.

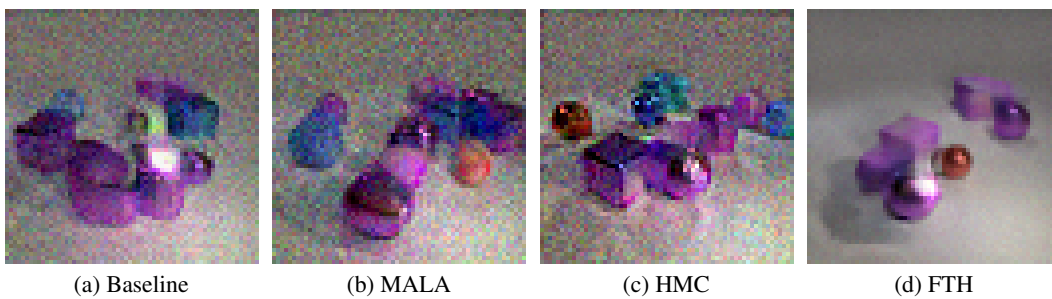

Figure 18: Generation of *cube* and *sphere*.

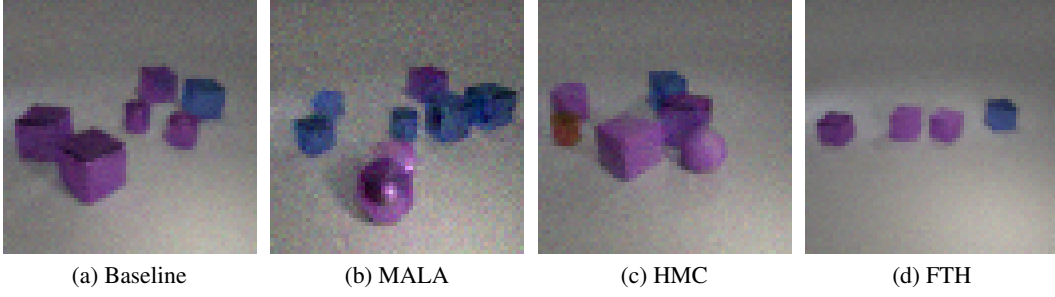Figure 19: Generation of *cube*.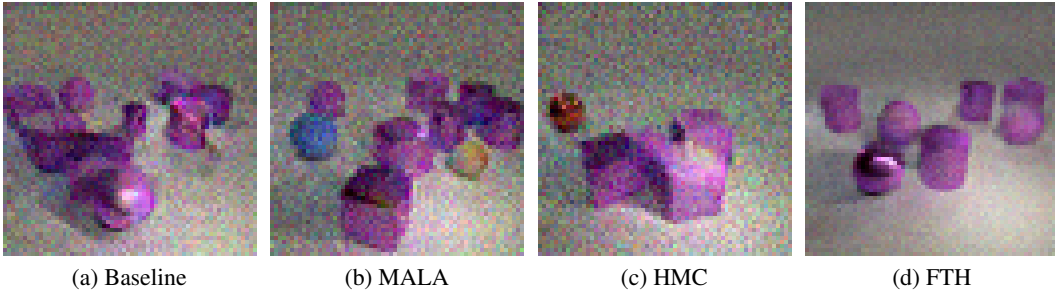Figure 20: Generation of *sphere* and *cylinder*.

## 564 C Supplementary Theorem

565 We now consider a scenario where the leader becomes corrupted, meaning the corrupted leader always  
 566 reports an unreasonably low energy but it is not actually in the lowest-energy position. In this situation,  
 567 the particles are optimizing a biased objective function. For simplicity, we consider a  $d$ -dimensional  
 568 Gaussian distribution  $p \sim e^{-U(x)}$  and its modification  $q \sim e^{-\psi(x)}$  with  $\psi(x) = U(x) + \frac{\lambda}{2}\|x - z\|^2$ .  
 569 We will analyze the Wasserstein distance between  $p$  and  $q$  for a fixed  $z \in \mathbb{R}^d$  as a function of  $\lambda > 0$ .  
 570 We will demonstrate that even though we sample from the distribution  $q$  instead of  $p$ , the bias of the  
 571 sampler (i.e., the distance between  $p$  and  $q$ ) can be controlled by  $\lambda$  and vanishes as  $\lambda \rightarrow 0$ .

572 *Assumption 1.*  $U : \mathbb{R}^d \rightarrow \mathbb{R}$  is  $M$ -Lipschitz-differentiable, i.e.  $\forall x, y \in \mathbb{R}^d$ ,

$$U(y) \leq U(x) + \nabla U(x)^T(y - x) + \frac{M}{2}\|y - x\|^2,$$

573 and  $U$  is  $m$ -Strongly-convex, i.e.  $\forall x, y \in \mathbb{R}^d$ ,

$$U(y) \geq U(x) + \nabla U(x)^T(y - x) + \frac{m}{2}\|y - x\|^2.$$

*Theorem 1.* Let  $U$  be the negative logarithmic probability density function of a  $d$ -dimensional Gaussian distribution, which satisfies Assumption 1. Let us define the function  $\psi(x)$  as  $\psi(x) = U(x) + \frac{\lambda}{2}\|x - z\|^2$ . Given this setup, the Wasserstein-2 distance between the modified Boltzmann distribution  $q$ , characterized by  $q \sim e^{-\psi(x)}$ , and the original Gaussian distribution  $p$ , denoted as  $p \sim e^{-U(x)}$ , can be bounded as:

$$W_2(p, q)^2 \leq \frac{\lambda^2 \|\Sigma\|}{I + \lambda \|\Sigma\|} \|z - x^*\|^2 + d \|\Sigma\| \cdot \left(1 - \frac{1}{\sqrt{\lambda \|\Sigma\| + 1}}\right)^2$$

574 where  $\|\cdot\|$  represents the matrix norm. Obviously,  $W_2(p, q) \rightarrow 0$  when  $\lambda \rightarrow 0$ .

575 *Proof.* By definition,  $U$  is  $m$ -strongly convex since

$$\begin{aligned} U(x) &= -\log \left[ (2\pi)^{-k/2} \det(\Sigma)^{-1/2} \exp \left( -\frac{1}{2}(x - x^*)^T \Sigma^{-1} (x - x^*) \right) \right] \\ &= \frac{k}{2} \log(2\pi) + \frac{1}{2} \log \det(\Sigma) + \frac{1}{2} (x - x^*)^T \Sigma^{-1} (x - x^*). \end{aligned}$$

576 The  $m$  corresponds to the smallest eigenvalue of  $\Sigma^{-1}$  which is therefore  $1/\|\Sigma\|$ . Then

$$\begin{aligned} \psi(x) &= \frac{k}{2} \log(2\pi) + \frac{1}{2} \log \det(\Sigma) + \frac{1}{2} (x - x^*)^T \Sigma^{-1} (x - x^*) + \frac{\lambda}{2} (x - z)^T (x - z) \\ &= \frac{1}{2} [x^T (\Sigma^{-1} + \lambda I) x - 2x^T (\Sigma^{-1} x^* + \lambda z)] + \text{constant} \\ &= \frac{1}{2} [(x - (\Sigma^{-1} + \lambda I)^{-1} (\Sigma^{-1} x^* + \lambda z))^T (\Sigma^{-1} + \lambda I) (x - (\Sigma^{-1} + \lambda I)^{-1} (\Sigma^{-1} x^* + \lambda z))] + \text{constant} \end{aligned}$$

577 The last equation was done by completing the square. Thus the new distribution is still a Gaussian  
578 distribution, represented as

$$q \sim \mathcal{N}((\Sigma^{-1} + \lambda I)^{-1} (\Sigma^{-1} x^* + \lambda z), (\Sigma^{-1} + \lambda I)^{-1}).$$

579 Consequently, the Wasserstein-2 distance can be determined as follows:

$$W_2(p, q)^2 = \|\mu_p - \mu_q\|^2 + \text{Tr} \left( \Sigma_p + \Sigma_q - 2(\Sigma_p^{1/2} \Sigma_q \Sigma_p^{1/2})^{1/2} \right)$$

In our case  $\mu_p = x^*$ ,  $\mu_q = (\Sigma^{-1} + \lambda I)^{-1} (\Sigma^{-1} x^* + \lambda z)$ ,  $\Sigma_q = \Sigma$ ,  $\Sigma_p = (\Sigma^{-1} + \lambda I)^{-1}$ . Since  $\Sigma_q$  and  $\Sigma_p$  can be jointly diagonalized by some orthonormal basis  $T$ ,

$$\Sigma_q \Sigma_p = T D_q T^{-1} T D_p T^{-1} = T D_p D_q T^{-1} = T D_p T^{-1} T D_q T^{-1} = \Sigma_p \Sigma_q,$$

thus  $\Sigma_q$  and  $\Sigma_p$  commute. We can simplify the Wasserstein distance to

$$W_2(p, q)^2 = \|\mu_p - \mu_q\|^2 + \|\Sigma_p^{1/2} - \Sigma_q^{1/2}\|_F^2.$$

Then

$$W_2(p, q)^2 = \|(\Sigma^{-1} + \lambda I)^{-1} (\Sigma^{-1} x^* + \lambda z) - x^*\|^2 + \|\Sigma^{1/2} - (\Sigma^{-1} + \lambda I)^{-1/2}\|_F^2.$$

Now we bound the first and second term independently. The first term is a direct conclusion from Theorem 15 in [41],

$$\|(\Sigma^{-1} + \lambda I)^{-1} (\Sigma^{-1} x^* + \lambda z) - x^*\|^2 \leq \frac{\lambda^2}{m(m + \lambda)} \|z - x^*\|^2, \quad \text{where } m = \|\Sigma^{-1}\|,$$

580 For the second term. We denote  $i^{\text{th}}$  eigenvalue of matrix  $\Sigma$  as  $\sigma_i$ , then  $\|\Sigma\| = \max_i \sigma_i$ , such that

$$\begin{aligned} \|\Sigma^{1/2} - (\Sigma^{-1} + \lambda I)^{-1/2}\|_F^2 &= \sum_{i \leq d} [\sigma_i^{1/2} - (\sigma_i^{-1} + \lambda)^{-1/2}]^2 \\ &= \sum_{i \leq d} \left[ \sqrt{\sigma_i} \cdot \left( 1 - \frac{1}{\sqrt{\lambda \sigma_i + 1}} \right) \right]^2 \\ &\leq d \|\Sigma\| \cdot \left( 1 - \frac{1}{\sqrt{\lambda \|\Sigma\| + 1}} \right)^2 \end{aligned}$$

Thus, by combing the two terms together, the total Wassertein distance is bounded by

$$W_2(p, q)^2 \leq \frac{\lambda^2}{m(m + \lambda)} \|z - x^*\|^2 + dM \cdot \left( 1 - \frac{1}{\sqrt{\lambda M + 1}} \right)^2$$

581

□

582 **NeurIPS Paper Checklist**

583 **1. Claims**

584 Question: Do the main claims made in the abstract and introduction accurately reflect the  
585 paper’s contributions and scope?

586 Answer: [Yes]

587 Justification: We clearly indicate the purpose and contribution of our paper.

588 **2. Limitations**

589 Question: Does the paper discuss the limitations of the work performed by the authors?

590 Answer: [No]

591 Justification: Our work builds upon previous research, serving as a complementary addition  
592 to it. However, we shall add further discussion in the future.

593 **3. Theory Assumptions and Proofs**

594 Question: For each theoretical result, does the paper provide the full set of assumptions and  
595 a complete (and correct) proof?

596 Answer: [Yes]

597 Justification: We do provide assumption and proof for our theorem.

598 **4. Experimental Result Reproducibility**

599 Question: Does the paper fully disclose all the information needed to reproduce the main ex-  
600 perimental results of the paper to the extent that it affects the main claims and/or conclusions  
601 of the paper (regardless of whether the code and data are provided or not)?

602 Answer: [Yes]

603 Justification: We show the details of how to reproduce the results and provide the codes for  
604 reproduction.

605 **5. Open access to data and code**

606 Question: Does the paper provide open access to the data and code, with sufficient instruc-  
607 tions to faithfully reproduce the main experimental results, as described in supplemental  
608 material?

609 Answer: [Yes]

610 Justification: We will do it once the paper gets accepted.

611 **6. Experimental Setting/Details**

612 Question: Does the paper specify all the training and test details (e.g., data splits, hyper-  
613 parameters, how they were chosen, type of optimizer, etc.) necessary to understand the  
614 results?

615 Answer: [Yes]

616 Justification: Yes we do.

617 **7. Experiment Statistical Significance**

618 Question: Does the paper report error bars suitably and correctly defined or other appropriate  
619 information about the statistical significance of the experiments?

620 Answer: [No]

621 Justification: Due to time constraints, we were unable to include that. However, we plan to  
622 add such statistics in the future.

623 **8. Experiments Compute Resources**

624 Question: For each experiment, does the paper provide sufficient information on the com-  
625 puter resources (type of compute workers, memory, time of execution) needed to reproduce  
626 the experiments?

627 Answer: [No]

628 Justification: We primarily focus on proposing a new algorithm, and most of our experiments  
629 require only a moderate amount of resources.

- 630 **9. Code Of Ethics**
- 631 Question: Does the research conducted in the paper conform, in every respect, with the
- 632 NeurIPS Code of Ethics <https://neurips.cc/public/EthicsGuidelines?>
- 633 Answer: [Yes]
- 634 Justification: Yes we do.
- 635 **10. Broader Impacts**
- 636 Question: Does the paper discuss both potential positive societal impacts and negative
- 637 societal impacts of the work performed?
- 638 Answer: [NA]
- 639 Justification: There is no social impact of our work.
- 640 **11. Safeguards**
- 641 Question: Does the paper describe safeguards that have been put in place for responsible
- 642 release of data or models that have a high risk for misuse (e.g., pretrained language models,
- 643 image generators, or scraped datasets)?
- 644 Answer: [NA]
- 645 Justification: There is no such a risk.
- 646 **12. Licenses for existing assets**
- 647 Question: Are the creators or original owners of assets (e.g., code, data, models), used in
- 648 the paper, properly credited and are the license and terms of use explicitly mentioned and
- 649 properly respected?
- 650 Answer: [NA]
- 651 Justification: No we don't have such a problem.
- 652 **13. New Assets**
- 653 Question: Are new assets introduced in the paper well documented and is the documentation
- 654 provided alongside the assets?
- 655 Answer: [NA]
- 656 Justification: No we don't have such a problem.
- 657 **14. Crowdsourcing and Research with Human Subjects**
- 658 Question: For crowdsourcing experiments and research with human subjects, does the paper
- 659 include the full text of instructions given to participants and screenshots, if applicable, as
- 660 well as details about compensation (if any)?
- 661 Answer: [NA]
- 662 Justification: No we don't have such a problem.
- 663 **15. Institutional Review Board (IRB) Approvals or Equivalent for Research with Human**
- 664 **Subjects**
- 665 Question: Does the paper describe potential risks incurred by study participants, whether
- 666 such risks were disclosed to the subjects, and whether Institutional Review Board (IRB)
- 667 approvals (or an equivalent approval/review based on the requirements of your country or
- 668 institution) were obtained?
- 669 Answer: [NA]
- 670 Justification: No we don't have such a problem.
